# Supplementary material
Source: HighWire-hosted journal article supplement (https://bmjopen.bmj.com/content/12/7/e060804)
Supplement: inline-supplementary-material-1 [file inline-supplementary-material-1.pdf]

BMJ

**Annex 1: Search term and results**

- 1) PUBMED = 1,564
  - COVID\* OR novel corona\* OR nCoV\* OR 2019nCoV OR severe acute respiratory syndrome coronavirus 2 OR severe acute respiratory pneumonia outbreak OR SARS CoV 2 OR SARS-CoV-2 (206,274)
  - therap\*[MeSH Terms] OR intervention[MeSH Terms] OR consultation[MeSH Terms] (7,081,376)
  - Mental Health [MeSH terms] OR Mental Disorders [MeSH terms] OR Mental Illness [MeSH terms] OR Suicide OR Depression OR Anxiety OR Psychological Distress [MeSH terms] OR Emotional Distress [MeSH terms] OR Insomnia [MeSH terms] (1,846,124)
- 2) EMBASE = 1,114
  - COVID\* (sh) or novel corona\*.mp. or nCoV\*.mp. or 2019nCoV.mp. or severe acute respiratory syndrome coronavirus 2 (sh) or severe acute respiratory pneumonia outbreak (sh) or SARS CoV 2.mp. or SARS-CoV-2.mp. (81,488)
  - (treatment or therap\*).mp. or intervention (sh) or consultation (sh) (13,205,742)
  - (Mental Health or Mental Disorders or Mental Illness).mp. or Suicide (sh) or Depression (sh) or Anxiety (sh) or Psychological Distress.mp. or Emotional Distress.mp. or Insomnia (sh) (1,017,858)
- 3) PsycInfo = 1,524
  - DE "Coronavirus" OR DE "COVID-19" OR DE "Severe Acute Respiratory Syndrome" (6,545)
  - intervention or program or counseling (1,095,058)
- 4) MEDLINE(OVID) = 1,417
  - (COVID\* or novel corona\* or nCoV\* or 2019nCoV or severe acute respiratory syndrome coronavirus 2 or severe acute respiratory pneumonia outbreak or SARS CoV 2 or SARS-CoV-2).mp. (124,422)
  - (therap\* or therap\* or intervention or consultation).mp. (6,269,680)
  - (Mental Health or Mental Disorders or Mental Illness or Suicid\* or Depression or Anxiety or Psychological Distress or Emotional Distress or Insomnia).mp. (638,321)
