# Supplementary material
Source: HighWire-hosted journal article supplement (https://bmjopen.bmj.com/content/12/7/e060804)
Supplement: inline-supplementary-material-3 [file inline-supplementary-material-3.pdf]

BMJ

**Annex 3****Table A3** Characteristics of the reviewed studies, intervention, measurement and psychological outcome

| Author                             | Study Design | Provider (channel)                    | Target population                                   | Intervention                                                                                      | N = Total sample<br>Nc: Control,<br>Ni: intervention) | Psychological outcome                       | Measurement and findings                                                            |
|------------------------------------|--------------|---------------------------------------|-----------------------------------------------------|---------------------------------------------------------------------------------------------------|-------------------------------------------------------|---------------------------------------------|-------------------------------------------------------------------------------------|
| Dincer and Inangil, Turkey(32)     | RCT          | Certified emotional freedom technique | Nurses                                              | Activating and deactivating signals to brain by stimulating points on skin                        | N = 72<br>Ni = 35<br>Nc = 37                          | Anxiety                                     | STAI (+)                                                                            |
| Fiol-DeRoque et al., Spain(33)     | RCT          | Self-conducted (online application)   | Health care workers                                 | PsyCovidApp, targeting emotional skills, healthy lifestyle behaviour, burnout, and social support | N = 436<br>Ni = 248<br>Nc = 234                       | Depression<br>Anxiety<br>Stress<br>Insomnia | PHQ-8 (na)<br>GAD7 (na)<br>DASS-21 (na)<br>ISI (na)                                 |
| Guan, et al. (Study 2B), China(43) | RCT          |                                       | General population                                  | Self-compassion writing task                                                                      | N = 79<br><br>Ni = 40<br>Nc = 39                      | Anxiety                                     | PHQ-4 (+)                                                                           |
| Guan et al. (Study 3), China(43)   | RCT          |                                       | College students                                    | Self-compassion meditation and writing tasks                                                      | N = 95<br>Ni = 50<br>Nc = 45                          | Anxiety<br>Self-compassion                  | PHQ-4 (+)<br>SCS (+)                                                                |
| Kahlon et al., US(39)              | RCT          | Trained callers (Telephone-based)     | Homebound older adults and people with disabilities | Phone call with empathetic conversations                                                          | N = 240<br>Nc = 120<br>Ni = 120                       | Depression<br>Anxiety<br>Loneliness         | GAD7 (+)<br>GAD7 (+)<br>UCLA Loneliness Scale (+),<br>De Jong Loneliness Scale (na) |
| Khademi et al., Iran(26)           | RCT          | Self-conducted                        | COVID-19 patients                                   | Performed mandala colouring                                                                       | N = 70<br>Ni = 35<br>Nc = 35                          | Anxiety                                     | GAD-7 (+)                                                                           |
| Liu et al., China(47)              | RCT          | Trainer                               | COVID-19 patients                                   | Jacobson's relaxation techniques                                                                  | Intervention = 51<br>Ni = 25                          | Anxiety<br>Insomnia                         | STAI (+)<br>SRSS (+)                                                                |

## BMJ

| Author                                | Study Design | Provider (channel)                     | Target population                  | Intervention                                                                                 | N = Total sample<br>Nc: Control,<br>Ni: intervention) | Psychological outcome                       | Measurement and findings                              |
|---------------------------------------|--------------|----------------------------------------|------------------------------------|----------------------------------------------------------------------------------------------|-------------------------------------------------------|---------------------------------------------|-------------------------------------------------------|
|                                       |              |                                        |                                    |                                                                                              | Nc = 26                                               |                                             |                                                       |
| Malboeuf-Hurtubise et al., Canada(40) | RCT          | Trained students in psychology (Video) | School students                    | Mindfulness-based interventions and philosophical discussions on COVID-19                    | N = 37<br>(Pre-post intervention assessment)          | Anxiety                                     | BASC III (+)                                          |
| Parizad et al., Iran(27)              | RCT          | Nurses                                 | COVID-19 Patients                  | Guided imagery session with five audio tracks                                                | N = 110<br>Nc = 55<br>Ni = 55                         | Anxiety                                     | STAI (+)                                              |
| Shaygan et al., Iran(28)              | RCT          | Self-conducted (online multimedia)     | COVID-19 patients                  | Cognitive behavioural techniques, stress management, mindfulness, and positive psychotherapy | N = 48<br>Ni = 26<br>Nc = 22                          | Stress                                      | PSS (+)                                               |
| Smith et al., US(41)                  | RCT          | Self-conducted (online application)    | Obstetric and gynaecology patients | Mobile meditation app: encouragement, mindfulness meditation, sleep stories, nature sounds   | N = 101<br>Ni = 50<br>Nc = 51                         | Depression<br>Anxiety<br>Stress<br>Insomnia | HADS (+)<br>HADS (+)<br>PSS (+)<br>PROMIS (+)         |
| Solianik et al., Lithuania(37)        | RCT          | Tai chi instructor (online)            | General population >60 years       | Tai chi practice                                                                             | N = 30<br>Ni = 15<br>Nc = 15                          | Depression<br>Anxiety<br>Stress             | HADS (+)<br>HADS (+)<br>PSS-10 (+)                    |
| Wadhen et al., UK(38)                 | RCT          | Yoga teacher (online)                  | General population                 | Yoga class via zoom meetings                                                                 | N = 34<br>Nc = 17<br>Ni = 17                          | Depression<br>Anxiety<br>Stress             | DASS-21 (+)<br>DASS-21 (na)<br>DASS-21 (na), PSS (na) |
| Zhang et al., China(49)               | RCT          | Self-conducted (Online)                | Residents                          | Mindfulness-Based Stress Reduction program                                                   | N = 51<br>Ni = 29                                     | Depression<br>Anxiety                       | BSI-18 (+)<br>BSI-18 (+)                              |

## BMJ

| Author                             | Study Design | Provider (channel)                            | Target population   | Intervention                                                                                   | N = Total sample<br>Nc: Control,<br>Ni: intervention)          | Psychological outcome                              | Measurement and findings                                                                                                   |
|------------------------------------|--------------|-----------------------------------------------|---------------------|------------------------------------------------------------------------------------------------|----------------------------------------------------------------|----------------------------------------------------|----------------------------------------------------------------------------------------------------------------------------|
|                                    |              |                                               |                     |                                                                                                | Nc = 28                                                        | Stress                                             | BSI-18 (+)                                                                                                                 |
| Kim et al., South Korea(44)        | NRS          | Psychiatrists (Telephone-based)               | COVID-19 patients   | Ward telephone providing information and support for COVID-19 infection and hospital isolation | Week1 n=33<br>Week2 n=19<br>(Pre-post intervention assessment) | Suicidal idea<br>Depression<br>Anxiety<br>Insomnia | BDI: week1 (+), week2 (na)<br>HADS: week1 (+), week2 (na)<br>HADS: week 1 (+), week 2 (na)<br>ISI: week 1 (+), week 2 (na) |
| Guan, et al. (Study 2A), China(43) | NRS          | Self-conducted (online)                       | Young adults        | A live session of self-compassion meditation                                                   | N = 64<br>(Pre-post intervention assessment)                   | Anxiety                                            | PHQ-4 (+)                                                                                                                  |
| Giordano et al., Italy(29)         | NRS          | Trained music therapist                       | Clinical staff      | Music therapy supplemented by guided imagery and music                                         | N = 34<br>(Pre-post intervention assessment)                   | Others: fear/ worry                                | MTC (+)                                                                                                                    |
| González-García et al., Spain(34)  | NRS          | Mindfulness teacher and psychologist (online) | University students | Minilectures, mindfulness and compassion practices and self-reflection exercises               | N = 66<br>(Pre-post intervention assessment)                   | Anxiety<br>Stress<br>Self-compassion               | DASS-21 (+)<br>DASS-21 (+)<br>DASS-21 (+)                                                                                  |
| Gorbeña, et al., Spain(35)         | NRS          | Facilitators (interview and music playlists)  | University students | Well-being and Personal Development Program                                                    | N = 151<br>Ni = 112<br>Nc= 39                                  | Stress                                             | PSS (+)                                                                                                                    |
| Li et al., China(45)               | NRS          | Teacher (Video)                               | Nurses              | Simulation training about using personal protective devices                                    | N = 60<br>(Pre-post intervention assessment)                   | Depression<br>Anxiety                              | SDS (+)<br>SAS (+)                                                                                                         |
| Liu et al., China(46)              | NRS          | Self-conducted                                | Nurses              | Diaphragmatic breathing relaxation training                                                    | N = 140<br>(Pre-post)                                          | Depression                                         | SDS (na)                                                                                                                   |

## BMJ

| Author                       | Study Design | Provider (channel)                                         | Target population    | Intervention                                                                   | N = Total sample<br>Nc: Control,<br>Ni: intervention) | Psychological outcome                    | Measurement and findings                            |
|------------------------------|--------------|------------------------------------------------------------|----------------------|--------------------------------------------------------------------------------|-------------------------------------------------------|------------------------------------------|-----------------------------------------------------|
|                              |              |                                                            |                      |                                                                                | intervention assessment)                              | Anxiety<br>Insomnia                      | SAS (+)<br>PSQI (+)                                 |
| Luo et al.,<br>China(48)     | NRS          | Nurses                                                     | COVID-19 patients    | Auricular point pressure                                                       | N = 84<br>Ni = 66<br>Nc = 18                          | Anxiety<br>Insomnia                      | GAD-7 (+)<br>SMH score (+)                          |
| Matiz et al.,<br>Italy(30)   | NRS          | Socio-health educator and psychologist                     | School teachers      | Mindfulness-oriented meditation training program                               | N = 67<br>(Pre-post intervention assessment)          | Depression<br>Anxiety                    | HADS (+)<br>HADS (+)                                |
| Niu et al.,<br>China(50)     | NRS          | Nurses                                                     | (Suspected) COVID-19 | Providing information about isolation, treatment, and social emotional support | N = 137<br>(Pre-post intervention assessment)         | Depression<br>Anxiety                    | PHQ-9 (+)<br>GAD-7 (+)                              |
| Philip et al.,<br>France(31) | NRS          | Self-conducted (online application)                        | General population   | KANOPEE app with virtual agent interaction                                     | N = 47<br>(Pre-post intervention assessment)          | Insomnia                                 | ISI (+)                                             |
| Riva et al.<br>Italy(36)     | NRS          | Self-conducted                                             | General population   | 360° VR video entitled 'The Secret Garden' and a series of social exercises    | N = 38<br>(Pre-post intervention assessment)          | Depression<br>Anxiety<br>Stress          | DASS-21 (+)<br>DASS-21 (na)<br>DASS-21 (+), PSS (+) |
| Sylvia et al.,<br>US(42)     | NRS          | Psychologists, physicians, social workers, nurses (online) | Health care workers  | Stress management and resilience training, relaxation response program         | N = 102<br>(Pre-post intervention assessment)         | Depression<br>Anxiety<br>Self-compassion | PHQ-4 (+)<br>PHQ-4 (+)<br>SCS (+)                   |

## BMJ

| Author                                 | Study Design | Provider (channel)                                         | Target population     | Intervention                                                                                     | N = Total sample<br>Nc: Control,<br>Ni: intervention) | Psychological outcome             | Measurement and findings           |
|----------------------------------------|--------------|------------------------------------------------------------|-----------------------|--------------------------------------------------------------------------------------------------|-------------------------------------------------------|-----------------------------------|------------------------------------|
| Tunuguntla et al.,<br>Global level(25) | NRS          | Self-conducted<br>(online)                                 | General<br>population | Yoga and meditation with<br>sound therapy                                                        | N = 820<br>(Pre-post<br>intervention<br>assessment)   | Insomnia                          | ISI (+)                            |
| Yang et al.,<br>China(51)              | NRS          | Psychotherapist<br>and nurse (in-<br>person and<br>online) | COVID-19<br>patients  | Psychotherapy, empathy,<br>muscle and breath relaxation,<br>and cognitive behavioural<br>therapy | N = 35<br>(Pre-post<br>intervention<br>assessment)    | Depression<br>Anxiety<br>Insomnia | PHQ-9 (+)<br>GAD-7 (+)<br>PSQI (+) |

RCT: Randomised controlled trial

NRS: Non-randomised controlled study

+ = Statistically significant association with post-intervention mental health improvements.
